# Supplementary material
Source: publisher figshare collection journal article supplement (https://sage.figshare.com/ndownloader/files/13365632)
Supplement: Supplementary file 1 [file 13365632]

**Table S1. Questionnaire utilized in the interviews.**

**About the plant**

1. On which tree / stone wall plants grow?
2. Which common name besides pitahaya has? Spanish / Maya?
3. How many pitahaya plants do you have in your garden?
4. For how long have you had the plants?
5. Who taught you about their care?
6. Where did the plant come from / grew up alone?
  - a. I buy it
  - b. Given as a gift/exchange
7. How was it given? In what way did he/she get it?
8. Apart from being edible, what other use do they give?

**Characteristics of the plant**

9. Do you know how many flowers are produced each year?
10. in what month?
11. In what months there are fruits?
  - a. How many times a year produces flowers/fruits?
12. Do you know how many fruits are produced each year?
13. How do you know fruit is ready to be harvested?
14. In your garden, there are different fruits in size, taste or color?
15. Do you know if there are different fruits in size, taste or color in other parts?
16. Where?
17. Are there pitahayas in the forest that grow alone?
18. Are they very abundant/ regular/scarce?
19. Who cultivates the pitahayas? women / men / children / all
20. How many fruits or kg do you get per harvest?
21. What is the care of the plant? Pruning / irrigation / fertilizer / weeding / other
22. Have you noticed any pitahaya disease?
23. Which ones?

**Sale**

24. Is the fruit sold/used for family consumption / given/exchanged?
  - a. How much does the kg/ fruit cost?
25. To whom do you sell it? Merchant / neighbors / others
26. If you sell, where do you sell them?
27. How much do you sell?
  - a. Do you exchange seeds or seedlings with friends or relatives?

**Uses**

28. Do you eat the pitahayas?
29. How do you consume them?
30. Who taught you how to prepare it? Father / mother / grandparents / other
31. Does the pitahaya have any special flavor? Can you describe it?
  - a. How could I describe the taste of pitahaya?

**Processing**

32. After harvesting the pitahaya, how do you keep them?

33. For how long? Days / months

34. Do you think that the form and quantity produced and consumed by pitahaya have varied over the years?

a. What is your opinion of the pitahayas? How do you think consumption or culture has changed over the years?

35. Observations

**Table S2. Type of variable, levels for qualitative variables, central tendency (mode for binary and categorical variables, median for ordinal variables and mean for discrete, interval and continuous quantitative variables) and statistical dispersion (standard deviation only for quantitative variables) used to fit the generalized linear models (GLM).**

| Variable                                           | Type                        | Levels <sup>a</sup>                                                                                      | central tendency                    | statistical dispersion <sup>b</sup> |
|----------------------------------------------------|-----------------------------|----------------------------------------------------------------------------------------------------------|-------------------------------------|-------------------------------------|
| Knowledge                                          | discrete                    |                                                                                                          | 23.31                               | 6.10                                |
| location                                           | quantitative<br>categorical | Hunucma, Nenelá, Sachcaba, Tixcacaltuyub, Tixkokob, Tixpehual, Tzucacab, Ucú, Umán, Xuilub and Yokdzonot | Hunucma (11) and Tixcacaltuyub (11) |                                     |
| latitude                                           | continuous                  |                                                                                                          | 20.79                               | 0.26                                |
| age                                                | quantitative<br>ordinal     | 15-25, 25-35, 35-45, 45-55, 55-65 and >70                                                                | 45-55 (24)                          |                                     |
| sex                                                | binary                      | male/female                                                                                              | Female (39)                         |                                     |
| Maya speaker                                       | ordinal                     | yes/no                                                                                                   | Yes (33)                            |                                     |
| use of traditional clothing                        | binary                      | yes/no                                                                                                   | No (41)                             |                                     |
| number of indigenous languages in the municipality | discrete<br>quantitative    |                                                                                                          | 3.09                                | 2.97                                |
| Number of Maya speakers in the municipality        | discrete<br>quantitative    |                                                                                                          | 6361                                | 3957.72                             |
| school attendance rate                             | interval<br>quantitative    |                                                                                                          | 59.70                               | 2.15                                |
| distance to the nearest city                       | continuous<br>quantitative  |                                                                                                          | 0.30                                | 0.17                                |

<sup>a</sup>Only for qualitative variables.

<sup>b</sup>Only for quantitative variables.
